1 **Title page**

2 **Patients' Experience and Satisfaction towards Virtual Health Care during the**  
3 **COVID-19 Pandemic in Southern Region of Saudi Arabia**

4  
5  
6 Ayed A. Shati<sup>1</sup>, Hasan S. Alamri<sup>2</sup>, Abdulaziz M. Al-Garni<sup>2</sup>, Syed E. Mahmood<sup>3</sup>, Awad S.  
7 Alsamghan<sup>3</sup>

8  
9  
10 <sup>1</sup> Department of Child Health, College of Medicine, King Khalid University, Abha, Saudi Arabia

11 <sup>2</sup> Department of Internal Medicine, Psychiatry Division, College of Medicine, King Khalid University,  
12 Abha, Saudi Arabia

13 <sup>3</sup> Department of Family and Community Medicine, College of Medicine, King Khalid University,  
14 Abha, Saudi Arabia

15  
16 Ayed A. Shati [shatiayed@gmail.com](mailto:shatiayed@gmail.com), [ashati@kku.edu.sa](mailto:ashati@kku.edu.sa)

17 Hasan S. Alamri [Hsalamri@kku.edu.sa](mailto:Hsalamri@kku.edu.sa)

18 Abdulaziz M. Al-Garni [amoalqarni@kku.edu.sa](mailto:amoalqarni@kku.edu.sa)

19 Syed E. Mahmood [semahmood@gmail.com](mailto:semahmood@gmail.com)

20 Awad S. Alsamghan [asoman@kku.edu.sa](mailto:asoman@kku.edu.sa)

21  
22  
23  
24 **Correspondence to**

25 Syed Esam Mahmood

26 Department of Family and Community Medicine,

27 College of Medicine, King Khalid University,

28 Abha, Saudi Arabia

29 E-mail: [smahmood@kku.edu.sa](mailto:smahmood@kku.edu.sa)

31

32 **Patients' Experience and Satisfaction towards Virtual Health Care during the**  
33 **COVID-19 Pandemic in Southern Region of Saudi Arabia**

34

35

36

37 **Abstract**

38 *Background:* Healthcare providers can use these virtual platforms for delivering medical advice  
39 and prescriptions of medications to patients. This study was aimed to explore the patient's  
40 experiences and level of satisfaction regarding virtual health care received during the COVID-19  
41 pandemic. This study also assessed the before and during lockdown sleep quality in these  
42 participants.

43 *Design and Methods:* The current study included 522 participants from Saudi Arabia. Virtual  
44 healthcare satisfaction questionnaire was implemented to record the data on patient experience  
45 toward the virtual health care during COVID-19 pandemic.

46 *Results:* Patients' opinions regarding virtual health care received during the COVID-19  
47 pandemic era are summarized using the "five-point Likert scale". The mean score of all the five  
48 statements is 4.15, reflecting 83% level of satisfaction of participants towards virtual health care.  
49 Among participants, mostly agreed that they were able to communicate adequately with doctors,  
50 the picture and sound quality of the virtual appointment were good, their privacy was respected  
51 during the consultation, they were comfortable during history taking and exams that were done,  
52 and the doctor explained solutions including prescribing medicine and/or providing advice.  
53 However, there was no significant association found between the type of specialty attended or  
54 patient demographic factors and level of satisfaction. Results of subjective sleep parameters

55 assessed before and during lock down are depicted. Results of t-test showed that the mean scores  
56 of all the components namely sleep duration ( $P<0.001$ ); sleep disturbances ( $P<0.001$ ), sleep  
57 latency ( $P<0.001$ ), daytime dysfunction ( $P<0.001$ ), habitual sleep efficiency ( $P<0.001$ ), and  
58 subjective sleep quality ( $P<0.001$ ) significantly differed between two assessment levels. Mean  
59 scores of all the components shifted towards higher values, representing worsening of sleep  
60 quality during the COVID-19 pandemic lock down.

61 *Conclusions:* Findings support and conclude that virtual health care system can be adopted in  
62 clinical settings.

63 **Key words:** COVID-19, pandemic, patient satisfaction, virtual healthcare.

64

65

66

67

## 68 **Introduction**

69 In face of an exponential increase in cases of COVID-19, healthcare systems worldwide are  
70 racing to adopt virtual consultations and treatment approaches [1]. This obviates the need for  
71 physical meetings between patients and healthcare providers, therefore increasing the safety for  
72 patients as well as for healthcare providers. The virtual or digital healthcare is cost effective and  
73 secure use of data and communication technologies to deal with several medical conditions  
74 without seeing the patient face to face [2]. Healthcare providers can use different virtual  
75 platforms such as real-time audio-video meeting or audio/text messaging to address patient's

76 concerns. Healthcare providers can use these virtual platforms for delivering medical advice and  
77 prescriptions of medications to patients [1,3]. The use of virtual health care has been suggested  
78 as a method to maintain a continuum of healthcare for patients [4,5]. As a result, the prevalence  
79 of virtual care has rapidly increased during this COVID-19 pandemic. There has been  
80 exponential increase in virtual healthcare consultations in the United States, China, Canada, UK,  
81 Italy, Germany, India, Cameroon, Ethiopia, Kenya, Malawi, Mozambique, South Africa, South  
82 Sudan, and Uganda during this COVID-19 [1]. In 2020, one of the study conducted in USA  
83 reported that the virtual consultations for telemedicine increased within four weeks from less  
84 than 1% to 70% [6]. In addition to these findings, several studies documented that virtual health  
85 care system along with telemedicine contribute to various health-related aspects such as to  
86 reduce crowding in hospitals and clinics, preventing non-emergency cases from unnecessary  
87 exposure to COVID-19 zones, and providing safety for both patients and healthcare providers  
88 [2,7,8,9]. However, there are certain concerns regarding the use of virtual healthcare system such  
89 as only little percentage of physicians and patients are adequately educated on how to utilize  
90 these digital services [2]. Other major concerns are the common problems in connectivity and  
91 how much the patients are satisfied with this virtual health care system. A study was conducted  
92 in 2019 about assessment of knowledge, perception and willingness of virtual consultation and  
93 telemedicine among physicians [10]. Authors reported that the main problems associated with  
94 virtual consultations and telemedicine was patient's privacy, high cost of equipment, lack of  
95 training and lack of connection between information technology expert and clinicians.

96 With regard to patient's level of satisfaction for virtual healthcare system, one retrospective  
97 cohort study was conducted in New York City to measure the patient satisfaction with  
98 telemedicine during the COVID-19 pandemic [11]. This study reported that patient satisfaction

99 with virtual consultation (video visits) is high. Another pilot study was carried out to measure the  
100 patient satisfaction with telemedicine in home health services for the Older person/persons [12].  
101 Authors reported that telemedicine was significantly effective in reducing the average number of  
102 clinic visits per month. Overall 72% of patients were satisfied with telemedicine.

103 Digital health started in Saudi Arabia since 2010. In 2017, the Ministry of Health launched the  
104 Tele-Health application called “Seha”. This application is used all over the kingdom for virtual  
105 medical consultation through voice and video calls. Since the surge of COVID-19 cases started,  
106 the Ministry of Health of Saudi Arabia suspended clinical visit, canceled nonemergency  
107 appointments and encouraged the community to use digital applications either for counseling or  
108 to attend appointments remotely in order to control the spread of disease. In order to measure the  
109 level of satisfaction of patients for virtual consultation during COVID-19, a study was conducted  
110 that showed that patients were highly satisfied. The level of satisfaction was 80.4% [13]. This  
111 study has a sample size limitation. However, overall there is a scarcity of related data that can  
112 signify the patient’s satisfaction level for the virtual health care system.

113 Above discussed literature signifies the importance of virtual healthcare system during this  
114 COVID-19 pandemic. But there are some important concerns such as the level of satisfaction of  
115 patients for this virtual health care system. There is scarcity of such reports from the region of  
116 Saudi Arabia. Further studies are required to assess patient perceptions of receiving medical care  
117 virtually, its advantages and challenges during the pandemic. Thus, current study was aimed to  
118 evaluate the patient experience toward the virtual health care during the COVID-19 pandemic in  
119 Saudi Arabia.

## 120 **Design and methods**

## 121 **Study design and Participants**

122 The current study is an observational descriptive cross-sectional study. The aim of the study was  
123 to explore patients' opinions regarding the virtual health care received during the COVID-19  
124 pandemic, to associate the type of specialized medical services received and patient  
125 sociodemographic factors with patients' level of satisfaction towards the virtual health care  
126 received, to explore the factors associated with dissatisfaction among patients during the virtual  
127 healthcare sessions, and to compare the before lock down and during lock down sleep quality to  
128 explore the impact of COVID-19 pandemic. The study was conducted from August 29, 2020 to  
129 November 29, 2020. Initially we recruited 583 participants from Saudi Arabia who have used  
130 virtual healthcare platforms at least once during the pandemic and aged  $\geq 18$  years. Among these  
131 participants, 61 participants were dropped out due to missing data, health related issues, lack of  
132 technical ability, and currently not residing in Saudi Arabia. Finally, 522 participants were  
133 included in this study. We hypothesized that the patients prefer and are satisfied regarding virtual  
134 health care during the COVID-19 pandemic in Saudi Arabia. The research question was: What  
135 are the patients' experiences and satisfaction regarding virtual health care during the COVID-19  
136 pandemic in Saudi Arabia?

137

138

139

## 140 **Participant inclusion criteria**

141 Participants should have access to required technology and the internet, is comfortable with  
142 using audio/video technology, has no physical/sensory/cognitive disabilities that would limit  
143 audio/video conference use, has access to email/chat, and is comfortable with using the modality.

#### 144 **Assessment of patient experience toward the virtual health care**

145 Virtual healthcare satisfaction questionnaire was implemented to record the data on patient  
146 experience toward the virtual health care. The questionnaire's purpose is to evaluate the  
147 satisfaction and viewpoints of patients regarding digital healthcare during COVID-19. This  
148 questionnaire contains questions regarding sociodemographic characteristics (Table 1) and  
149 telemedicine satisfaction (Supplementary Table 1).

#### 150 **Ethical approval**

151 Current study was approved (Approval No.: ECM#2020-1002) by the Research Ethics  
152 Committee, King Khalid University, Saudi Arabia on 19/08/2020. All participants provided their  
153 oral and written consent. Participants were assured that the information will be handled  
154 anonymously and for scientific purposes only.

#### 155 **Statistical Analysis**

156 The data analysis related to evaluation of patient experience toward the virtual health care  
157 included two stages. The first stage included a descriptive analysis, in which numerical variables  
158 were reported in terms of means, standard deviations and standard errors. The second stage  
159 included hypothesis testing using the Pearson Chi-Square test and Likert scale analysis.  
160 Moreover, we employed paired samples t-test to compare the responses of participants for the  
161 before lock down and during lock down sleep quality. All the data was analyzed in SPSS  
162 (Version 22.0).

163 **Results**

164 **Descriptive Analysis**

165 *Socio-demographic information*

166 Socio-demographic information of all the participants is presented in Table 1. Among the  
167 participants, 291 (55.7%) belonged to younger age group of 18-25 years and 80.5% of total  
168 participants had received university level education. Majority of the participants (n=503; 96.4%)  
169 included in the current study are Saudi nationals.

170 *Patients' opinions regarding virtual health care and Likert Scale Analysis*

171 Patients' opinions regarding virtual health care received during the COVID-19 pandemic era are  
172 summarized in Supplementary Table 1. The "five-point Likert scale" gives weight as value 4.21  
173 – 5.00 (Strongly Agree), 3.41 – 4.20 (Agree), 2.61 – 3.40 (Neutral), 1.81 – 2.60 (Disagree), and  
174 1.00 – 1.80 (Strongly Disagree). cis presented in Table 2. Results showed that most participants  
175 agreed that they were able to communicate adequately with doctors (189 (36.2%) strongly agreed  
176 and 212 (40.6%) agreed), the picture and sound quality of the virtual appointment were good  
177 (203 (38.9) strongly agreed and 214 (41%) agreed), their privacy was respected during the  
178 consultation (267 (51.1) strongly agreed and 196 (37.5) agreed), they were comfortable during  
179 history taking and exams that were done (210 (40.2) strongly agreed and 218 (41.8) agreed), and  
180 the doctor explained solutions including prescribing medicine and/or providing advice (222  
181 (42.5) strongly agreed and 196 (37.5) agreed). The mean and standard deviations of all the five  
182 statements are presented in Table 3. Overall, statement 3 (My privacy was respected during  
183 consultations) has the highest satisfaction level of 4.36 (Strongly agree). The mean score of all



184 the five statements is 4.15, reflecting 83% level of satisfaction of participants towards virtual  
185 health care (Table 3).

## 186 **Bivariate Analysis**

187 *Testing the association between the types of specialized medical services received with the*  
188 *patients' level of satisfaction towards the virtual health care received (Chi Square test)*

189 Table 4 present the association between the types of specialized medical services received and  
190 the patient's level of satisfaction towards the virtual health care (reported using the Pearson  
191 chisquare test). Results showed no significant association between the type of specialized  
192 medical services received and the patient's level of satisfaction towards the virtual health care.

193 *Testing the association between socio-demographic factors with patients' level of satisfaction*  
194 *towards the virtual health care received (Chi Square test)*

195 Table 5 presents the association between patient's demographic factors and their level of  
196 satisfaction towards the virtual health care (reported using the Pearson chi-square). No  
197 significant association was found between the demographic factors and patient level of  
198 satisfaction towards the virtual health care.

199 *Exploring the factors associated with dissatisfaction among patients during the virtual health*  
200 *care sessions.*

201 We also explored the dissatisfaction among patients during their virtual healthcare sessions  
202 (Table 6). The dissatisfaction includes problem related with internet connection, taking long time  
203 and difficulty in explaining different concern.

204 **Analyses of the sleep quality before and during COVID-19 lock down**

205 *Frequency distribution of participants with good and bad sleep before and during COVID-19*  
206 *pandemic lock down*

207 Frequency distribution of good and bad sleep sleepers was computed based on the PSQI global  
208 scores obtained at the two assessment levels, i.e., before and during the COVID-19 pandemic  
209 lock down. Before lockdown scores showed that 87% participants were good sleepers (i.e., PSQI  
210 < 5) and 13% were bad sleepers (i.e., PSQI  $\geq$  5), whereas during lock down assessment showed  
211 that the distribution of bad sleepers increased significantly increased ( $p < 0.001$ ) from 13% to 83%  
212 and the distribution of good sleepers significantly reduced ( $p < 0.001$ ) from 87% to 17%.

213 *Subjective sleep parameters*

214 Results of subjective sleep parameters assessed before and during lock down are depicted in  
215 Table 7. Results of t-test showed that the mean scores of all the components namely sleep  
216 duration ( $P < 0.001$ ); sleep disturbances ( $P < 0.001$ ), sleep latency ( $P < 0.001$ ), daytime dysfunction  
217 ( $P < 0.001$ ), habitual sleep efficiency ( $P < 0.001$ ), and subjective sleep quality ( $P < 0.001$ )  
218 significantly differed between two assessment levels. Mean scores of all the components shifted  
219 towards higher values, representing worsening of sleep quality during the COVID-19 pandemic  
220 lock down.

221 **Discussion**

222 The novel coronavirus disease-19 (COVID-19) pandemic has altered several aspects such as  
223 economy, society, and healthcare system. Healthcare systems worldwide are racing to adopt  
224 virtualized consultations and treatment approaches [1]. Telehealth programs such as virtualized  
225 consultations and treatment approaches overcome physical barriers to provide patients and  
226 caregivers access to convenient medical care [6]. As a result, the prevalence of virtual care has

227 rapidly increased thought out the world during this COVID-19 pandemic [1]. However, there are  
228 certain concerns regarding the use of virtual healthcare system, reflecting the need of an  
229 assessment of level of satisfaction of people for these virtual interface platforms [2]. For example  
230 one study was recently conducted to assess the knowledge, perception and willingness for virtual  
231 consultation and telemedicine [10]. Authors reported that lack of training and lack of connection  
232 between information technology expert and clinicians, lack of training in patients, patient's care  
233 about their privacy, etc were the main problems associated with virtual consultations and  
234 telemedicine.

235 Despite of the facts, one study was previously conducted in Saudi Arabia, where authors  
236 evaluated the physician's willingness towards adopting telemedicine in clinical practice [10].  
237 Authors reported that most of the participants showed positive perceptions of virtual health care  
238 and are willing to adopt it in clinical practice. However, there are several major barriers such as  
239 privacy issues, lack of training, cost and issues related to information and communication  
240 technology for the adoption of virtual health care system.

241 One study was conducted in British Columbia, Canada regarding the satisfaction of patients  
242 about virtual visits and patient centered care [14]. This study reported that about 93.2% of  
243 respondents saying their virtual visits were of high quality, 91.2% participants reporting their  
244 virtual visits as "very" or "somewhat" helpful to resolve their health issue, and 79% were having  
245 confidence in the security and privacy of this virtual healthcare system. This is somewhat in line  
246 with findings of our current study, where responses of majority of the participants reflect that  
247 they were comfortable and satisfied with virtual health care. These findings together support for  
248 the adaptation of virtual health care system in the clinical settings.

249

250 In current study the level of satisfaction towards virtual healthcare was high (83%). This echoes  
251 the finding of previous study published about patient satisfaction toward a virtual healthcare in  
252 endocrinology clinics in Saudi Arabia [13] Authors reported that the level of satisfaction for  
253 virtual health care system was about 80.4%. A study was conducted in Chile aimed to assess  
254 patient satisfaction with tele-neurology and it was found that the level of satisfaction was high  
255 about 97% [15]. One study evaluated usability and satisfaction of telemedicine for head and neck  
256 ambulatory visits [16]. This study reported that the patients were highly satisfied with  
257 telemedicine. Another study was aimed to characterized telemedicine and correlates it with  
258 patient's level of satisfaction [17]. This study showed that the overall 85% of patients rated their  
259 satisfaction with their telemedicine physician five stars on scales of 0 to 5. About the problems  
260 participants faced during virtual session, long waited time was on top followed by difficult to  
261 clarify their concerns and internet connection problems. Our findings are supported by another  
262 recent study in Saudi Arabia and nearly half of the participants wanted to continue using virtual  
263 services even after the COVID-19 pandemic was over [18]. More effort should be made to  
264 increase patient awareness and knowledge about virtual clinics. Saudi Arabian citizens believe  
265 that telemedicine saves time, labour and costs and is an effective tool to treat coronavirus  
266 patients at a safe distance. [19]

267 Our findings are also comparable to the Argentina study which created and implemented a virtual  
268 care program for patients with URTI during the epidemiological outbreak. [20]. Based on their work,  
269 they deemed this new care strategy could help prevent hospital overcrowding, reduce long delays  
270 inattention (or at least offer the possibility of waiting at home), avoid unnecessary referrals, and  
271 limit infections in waiting rooms. The inability to meet the health-care professional face-to-face  
272 was reported by 53.8% as the most important disadvantage in another cross-sectional study  
273 conducted among patients who had experienced virtual clinics in primary healthcare centers in  
274 Riyadh, Saudi Arabia [21].

275 The key advantage of telemedicine is its mobility, and it presented a perfect match in the current  
276 public health policy of social distancing and cancellation of non-urgent consultations and  
277 surgeries [22]. The virtual clinic services in Saudi Arabia provides a wide range of health-care  
278 consultations in different fields such as family medicine, general surgery, ophthalmology, ENT,  
279 Obstetrics /Gynecology, dermatology, chronic diseases, pediatrics and vaccinations However,  
280 there are no current data on the exact number of virtual clinics. [23]. The Sehhaty mobile

281 application can be used by a patient to directly book an appointment if the service is available in  
282 the healthcare facility. The “Seha Virtual Hospital”, supports a total of 130 hospitals around the  
283 country and provides specialized virtual clinics such as psychiatry, cardiac, endocrine, and  
284 diabetes clinics [24]. Other applications (TETAMMAN, TABAUD, TAWAKKALNA) that have  
285 been launched have improved the quality of using telemedicine activities and facilitated all  
286 health services [25]. This accelerated digital health innovation in Saudi Arabia and allowed  
287 patients to recognise the benefits of digital health. This has huge potential for increasing  
288 continuous patient engagement with PHCs [26].

289 Specific patient education experiences might be most helpful for patients in learning about  
290 virtual care. People with lived experience could be resources for educating patients and  
291 community-based knowledge sharing was also encouraged (27). Our sample size had less  
292 number of older people, the probable reason is they were less likely to have used or familiar  
293 telehealth. The results of an Australian population support this need for better support for older  
294 people to access remote modes of care (28). Willingness to use telemedicine in future was high  
295 in the recipients as well as the providers of healthcare during COVID-19 pandemic in UK(29).  
296 The findings from a Saudi study showed that 70.6% of participants were aware of the existence of virtual  
297 clinics and 34.6% of participants were post-pandemic users (30). Over 90% Saudis preferred having a  
298 virtual appointment over an in-person visit according to a recent study. About half had telephone  
299 consultations, while about a third had video calls through hospital-provided platforms; >90% found virtual  
300 appointments useful and convenient, and 97.4% were satisfied with their remote consultation experience  
301 despite the technical interruptions. (31). Telemedicine has developed rapidly during the COVID-19  
302 pandemic, and its satisfaction measurement factors may be changed in the future. Du, Y. et al developed  
303 a scale for evaluating patient satisfaction with telemedicine by applying multidimensional constructs to  
304 capture patient satisfaction comprehensively, which involves nine dimensions, such as humanistic care,  
305 doctor-patient communication, service efficiency, diagnosis and treatment result, ease of use, system

306 quality, usefulness, privacy and security, overall satisfaction. This scale could be a meaningful tool for  
307 future studies (32).

308 The limitation of this study is the implicit bias usually present in this descriptive, online  
309 voluntary response survey, and the relatively low response rate. The dropout rate of participants  
310 raises concerns about sample representativeness and potential bias. Moreover, the study's  
311 reliance on voluntary participation introduces self-selection bias, as individuals who are more  
312 satisfied or dissatisfied with virtual healthcare may be more inclined to participate. The inclusion  
313 criteria focus primarily on technological access and comfort rather than broader factors that  
314 could influence patient satisfaction, such as socioeconomic status or health literacy. This narrow  
315 focus may limit the generalizability of the findings. Other study limitation is a small sample size  
316 and limitation of generalizability of the results due to the small sample size. We hope in the  
317 future to have all the required resources to do multicentric /nationwide studies with a larger  
318 sample size. However, as the importance of patient satisfaction continues to increase in the  
319 provision of health care, this work is considered to be an important step in this direction,  
320 particularly in Saudi Arabia.

321

322

323

## 324 **Conclusions**

325 Findings from the current study reflected that most of the participants were satisfied with virtual  
326 healthcare system. The virtual healthcare could help prevent overcrowding in health facilities  
327 especially in such pandemics, decrease delays in attention and avoid unnecessary in-person

328 visits, easing access to healthcare services possibly by providing patients with needed care at  
329 appropriate time. All of these could have a significant impact on costs and patient satisfaction but  
330 not necessarily displacing in-person visits to hospital and clinics. Future studies with a larger  
331 sample size and multicentric in nature need to further explore the patient's experiences and level  
332 of satisfaction regarding virtual health care in Saudi Arabia. This will help to further continue  
333 and expand the telehealth services in the Kingdom. It will also give telemedicine providers  
334 insights into areas where they can improve their services.

### 335 **Declaration of Interest**

336 The authors report no conflict of interest.

### 337 **Acknowledgements**

338 The authors are thankful to the Institute of Research and consulting studies at King Khalid  
339 University for supporting this research (grant number 4-N-20/21).

### 340 **Contributions**

341 All authors contributed significantly & agreed with the manuscript content, have read carefully  
342 & approved the final version.

### 343 **Funding**

344 The authors extend their appreciation to the Deanship of Scientific Research at King Khalid  
345 University for funding this work through large group Research Project under grant number:  
346 RGP2/378/44

347

## 348   **References**

- 349    1. Webster P. Virtual health care in the era of COVID-19. *Lancet*. 2020;395(10231):1180-  
350    1181. doi: 10.1016/S0140-6736(20)30818-7.
- 351    2. Jnr BA. Use of Telemedicine and Virtual Care for Remote Treatment in Response to  
352    COVID-19 Pandemic. *J Med Syst*. 2020;44(7):132. doi: 10.1007/s10916-020-01596-5.
- 353    3. Craig J, Patterson V. Introduction to the practice of telemedicine. *J Telemed Telecare*.  
354    2005;11(1):3-9. doi: 10.1177/1357633X0501100102.
- 355    4. Lee I, Kovarik C, Tejasvi T, Pizarro M, Lipoff JB. Telehealth: Helping your patients and  
356    practice survive and thrive during the COVID-19 crisis with rapid quality implementation.  
357    *J Am Acad Dermatol*. 2020;82(5):1213-1214. doi: 10.1016/j.jaad.2020.03.052.
- 358    5. Bryant MS, Fedson SE, Sharafkhaneh A. Using Telehealth Cardiopulmonary  
359    Rehabilitation during the COVID-19 Pandemic. *J Med Syst*. 2020;28;44(7):125. doi:  
360    10.1007/s10916-020-01593-8.
- 361    6. Wosik J, Fudim M, Cameron B, Gellad ZF, Cho A, Phinney D, Curtis S, Roman M, Poon  
362    EG, Ferranti J, Katz JN, Tchong J. Telehealth transformation: COVID-19 and the rise of  
363    virtual care. *J Am Med Inform Assoc*. 2020;27(6):957-962. doi: 10.1093/jamia/ocaa067.
- 364    7. Monaghesh E, Hajizadeh A. The role of telehealth during COVID-19 outbreak: a  
365    systematic review based on current evidence. *BMC Public Health*. 2020;20(1):1193. doi:  
366    10.1186/s12889-020-09301-4.
- 367    8. Rockwell KL, Gilroy AS. Incorporating telemedicine as part of COVID-19 outbreak  
368    response systems. *Am J Manag Care*. 2020;26(4):147-148. doi:  
369    10.37765/ajmc.2020.42784.
- 370    9. Song X, Liu X, Wang C. The role of telemedicine during the COVID-19 epidemic in  
371    China-experience from Shandong province. *Crit Care*. 2020;28;24(1):178. doi:  
372    10.1186/s13054-020-02884-9.
- 373    10. Albarrak AI, Mohammed R, Almarshoud N, Almujailli L, Aljaeed R, Altuwaijiri S  
374    Albohairy T. Assessment of physician's knowledge, perception and willingness of  
375    telemedicine in Riyadh region, Saudi Arabia. *Journal of Infection and Public Health*.  
376    2021;14(1): 97-102. doi: 10.1016/j.jiph.2019.04.006.



- 377 11. Ramaswamy A, Yu M, Drangsholt S, Ng E, Culligan PJ, Schlegel PN, Hu JC. Patient  
378 Satisfaction With Telemedicine During the COVID-19 Pandemic: Retrospective Cohort  
379 Study *J Med Internet Res.* 2020;22(9):e20786 doi: 10.2196/20786.
- 380 12. Chae YM, Heon Lee J, Hee Ho S, Ja Kim H, Hong Jun K, Uk Won J. Patient satisfaction  
381 with telemedicine in home health services for the Older person/persons. *Int J Med Inform.*  
382 2001;61(2- 3):167-73. doi: 10.1016/s1386-5056(01)00139-3.
- 383 13. Alhumud A, Al Adel F, Alwazae M, Althaqib G, Almutairi A. Patient Satisfaction Toward  
384 a Tele-Retinal Screening Program in Endocrinology Clinics at a Tertiary Hospital in  
385 Riyadh, Saudi Arabia. *Cureus.* 2020;12(5):e7986. doi:10.7759/cureus.7986.
- 386 14. McGrail KM, Ahuja MA, Leaver CA. Virtual Visits and Patient-Centered Care: Results of  
387 a patient survey and observational study. *J Med Internet Res.* 2017;19(5):e177. doi:  
388 10.2196/jmir.7374.
- 389 15. Constanzo F, Aracena-Sherck P, Hidalgo JP, Muñoz M, Vergara G, Alvarado C.  
390 Validation of a patient satisfaction survey of the Teleneurology program in Chile. *BMC*  
391 *Res Notes.* 2019;12(1):359. doi: 10.1186/s13104-019-4358-1.
- 392 16. Layfield E, Triantafillou V, Prasad A, Deng J, Shanti RM, Newman JG, Rajasekaran K.  
393 Telemedicine for head and neck ambulatory visits during COVID-19: Evaluating usability  
394 and patient satisfaction. *Head Neck.* 2020;42(7):1681-1689. doi: 10.1002/hed.26285.
- 395 17. Martinez KA, Rood M, Jhangiani N, Kou L, Rose S, Boissy A, Rothberg MB. Patterns of  
396 use and correlates of patient satisfaction with a large nationwide direct to consumer  
397 telemedicine service. *J Gen Intern Med.* 2018;33(10):1768-1773. doi: 10.1007/s11606-  
398 018-4621-5.
- 399 18. AlJaloud AM, Al Suwyed A, Al Zoman KH, Tabbaa MY, Alwin Robert A, Al-Nowaiser AM,  
400 Alotaibi F, Alfaifi MA, Almubarak SA 4th. Patient Perceptions and Satisfaction with Virtual  
401 Clinics During the COVID-19 Pandemic: A Cross-Sectional Study. *Cureus.* 2023 Jul  
402 25;15(7):e42450. doi: 10.7759/cureus.42450.
- 403 19. Alajwari HA, Alfayez A, Alsalman D, Alanezi F, Alhodaib H, Al-Rayes S, et al. Knowledge and  
404 attitude of Saudi Arabian citizens towards telemedicine during the COVID-19 pandemic,  
405 *International Health,* 2022, 14(6): 604–609. <https://doi.org/10.1093/inthealth/ihab082>
- 406 20. Frid SA, Ratti MFG, Pedretti A, Pollan J, Martínez B, Abreu AL, Diodati G, López G,  
407 Sommer J, Luna D, Plazzotta F. Telemedicine for Upper Respiratory Tract Infections

- 408 During 2018 Epidemiological Outbreak in South America. *Stud Health Technol Inform.*  
409 2019;264:586-590. doi: 10.3233/SHTI190290.
- 410 21. Alharbi KG, Aldosari MN, Alhassan AM, Alshallal KA, Altamimi AM, Altulaihi BA.  
411 Patient satisfaction with virtual clinic during Coronavirus disease (COVID-19) pandemic  
412 in primary healthcare, Riyadh, Saudi Arabia. *J Family Community Med.* 2021 Jan-  
413 Apr;28(1):48-54. doi: 10.4103/jfcm.JFCM\_353\_20.
- 414 22. Denadai R. COVID-19 Pandemic as a Driver for Spreading Virtual Care Globally: The  
415 Future Starts Now. *Clinics (Sao Paulo).* 2020;75:e1967. doi: 10.6061/clinics/2020/e1967.
- 416 23. Alharbi KG, Aldosari MN, Alhassan AM, Alshallal KA, Altamimi AM, Altulaihi BA.  
417 Patient satisfaction with virtual clinic during Coronavirus disease (COVID-19) pandemic  
418 in primary healthcare, Riyadh, Saudi Arabia. *J Family Community Med.* 2021 Jan-  
419 Apr;28(1):48-54. doi: 10.4103/jfcm.JFCM\_353\_20.
- 420 24. Ministry of Health, Digital Health Center of Excellence. 2022. Available online:  
421 [https://www.moh.gov.sa/en/Ministry/Projects/Digital-Health-Center-of-](https://www.moh.gov.sa/en/Ministry/Projects/Digital-Health-Center-of-Excellence/Pages/Programs.aspx)  
422 [Excellence/Pages/Programs.aspx](https://www.moh.gov.sa/en/Ministry/Projects/Digital-Health-Center-of-Excellence/Pages/Programs.aspx) (accessed on 9 September 2022).
- 423 25. Alsharif, SH.; Alsharif, N; Alassiri, R; Khouj, G; Alshareef, N; Aloufi, A; Hussain, A[.  
424 Assessment of the Saudi Arabian Telemedicine Experience During the COVID-19  
425 Pandemic: Dermatology-Related Consultations as a Case. *Journal of Dermatology and*  
426 *Dermatologic Surgery* 2022; 26(1):p 18-24. | DOI: 10.4103/jdds.jdds\_67\_21
- 427 26. Alghamdi, A., Ramsay, A.I.G., Abrams, R. et al. The impact of COVID-19 on patient  
428 engagement with primary healthcare: lessons from the audi primary care setting. *BMC*  
429 *Prim. Care* 24, 177 (2023). <https://doi.org/10.1186/s12875-023-02131-4>
- 430 27. Curran VR, Hollett A, Peddle E. Patient Experiences With Virtual Care During the  
431 COVID-19 Pandemic: Phenomenological Focus Group Study. *JMIR Form Res.* 2023 May  
432 1;7:e42966. doi: 10.2196/42966. PMID: 37036827; PMCID: PMC10154021.
- 433 28. Thomas E, Lee C, Norman R, Wells L, Shaw T, Nesbitt J, Frean I, Baxby L, Bennett S,  
434 Robinson S. Patient Use, Experience, and Satisfaction With Telehealth in an Australian  
435 Population (Reimagining Health Care): Web-Based Survey Study. *J Med Internet Res*  
436 2023;25:e45016 URL: <https://www.jmir.org/2023/1/e45016> DOI: 10.2196/45016

- 437 29. Alashek, WA., & Ali, SA. Satisfaction with telemedicine use during COVID-19 pandemic in  
438 the UK: a systematic review. *Libyan Journal of Medicine* 2024; 19(1).  
439 <https://doi.org/10.1080/19932820.2024.2301829>
- 440 30. Al-Rayes, S.; Alumran, A.; Aljanoubi, H.; Alkaltham, A.; Alghamdi, M.; Aljabri, D.  
441 Awareness and Use of Virtual Clinics following the COVID-19 Pandemic in Saudi Arabia.  
442 *Healthcare* 2022, 10, 1893. <https://doi.org/10.3390/healthcare10101893>
- 443 31. AlShareef, S.M.; AlWabel, A.A. Patient Opinions about Virtual Consultations in Saudi  
444 Arabia: A Nationwide Cross-Sectional Study. *Healthcare* 2024, 12, 1001.  
445 <https://doi.org/10.3390/healthcare12101001>
- 446 32. Du, Y., Gu, Y. The development of evaluation scale of the patient satisfaction with  
447 telemedicine: a systematic review. *BMC Med Inform Decis Mak* 24, 31 (2024).  
448 <https://doi.org/10.1186/s12911-024-02436-z>
- 449
- 450
- 451

**Table 1. Demographics characteristics of the participants (n=522)**

| <b>Age</b>               |            |
|--------------------------|------------|
| 18- 25 years             | 291 (55.7) |
| 26-35 years              | 105 (20.1) |
| 36-45 years              | 74 (14.2)  |
| 46-55 years              | 35 (6.7)   |
| Above 55 years           | 17 (3.3)   |
| <b>Gender</b>            |            |
| Male                     | 201 (38.5) |
| Female                   | 321 (61.5) |
| <b>Educational level</b> |            |
| Primary School           | 1 (0.2)    |
| Middle School            | 9 (1.7)    |
| High school              | 92 (17.6)  |
| University               | 370 (70.9) |

|                       |            |
|-----------------------|------------|
| Postgraduate studies  | 50 (9.6)   |
| <b>Nationality</b>    |            |
| Saudi                 | 503 (96.4) |
| Non-Saudi             | 19 (3.6)   |
| <b>Residency</b>      |            |
| Central Saudi Arabia  | 156 (29.9) |
| Eastern Saudi Arabia  | 38 (7.3)   |
| Western Saudi Arabia  | 98 (18.8)  |
| Northern Saudi Arabia | 22 (4.2)   |
| Southern Saudi Arabia | 208 (39.8) |

---

All values are presented as numbers and percentages

---

452

453

**Table 2. Patients' level of satisfaction towards the virtual health care received (5-point Likert scale analysis)**

| S.No. | Statement                                                                                   | Strongly Agree<br>n (%) | Agree<br>n (%) | Neutral<br>n (%) | Disagree<br>n (%) | Strongly Disagree<br>n (%) |
|-------|---------------------------------------------------------------------------------------------|-------------------------|----------------|------------------|-------------------|----------------------------|
| 1.    | I was able to communicate adequately with my doctor                                         | 189 (36.2)              | 212 (40.6)     | 85 (16.3)        | 24 (4.6)          | 12 (2.3)                   |
| 2.    | The picture and sound quality were good                                                     | 203 (38.9)              | 214 (41)       | 78 (14.9)        | 17 (3.3)          | 10 (1.9)                   |
| 3.    | My privacy was respected during consultations                                               | 267 (51.1)              | 196 (37.5)     | 45 (8.6)         | 7 (1.3)           | 7 (1.3)                    |
| 4.    | I was comfortable during history taking and exams that were done                            | 210 (40.2)              | 218 (41.8)     | 65 (12.5)        | 15 (2.9)          | 14 (2.7)                   |
| 5.    | The doctor explained to me solutions including prescribing medicine and/or providing advice | 222 (42.5)              | 196 (37.5)     | 63 (12.1)        | 22 (4.2)          | 19 (3.6)                   |

454

455

**Table 3. Patients' level of satisfaction towards the virtual health care received (5-point Likert scale analysis)**

| S.No.      | Statement                                                                                   | Mean | SD   | Rank | Level of satisfaction |
|------------|---------------------------------------------------------------------------------------------|------|------|------|-----------------------|
| 1          | I was able to communicate adequately with the doctor                                        | 4.04 | 0.96 | 5    | Agree                 |
| 2          | The picture and sound quality were good                                                     | 4.12 | 0.91 | 3    | Agree                 |
| 3          | My privacy was respected during consultations                                               | 4.36 | 0.80 | 1    | Strongly Agree        |
| 4          | I was comfortable during history taking and exams that were done                            | 4.14 | 0.93 | 2    | Agree                 |
| 5          | The doctor explained to me solutions including prescribing medicine and/or providing advice | 4.11 | 1.02 | 4    | Agree                 |
| Mean score |                                                                                             | 4.15 |      |      |                       |

456

457

**Table 4. Testing the association between the types of specialized medical services received with the patients' level of satisfaction towards the virtual health care received (Chi Square test).**

| Specialty attended        | Level of satisfaction   |                |                  |                   |                            | P-value |
|---------------------------|-------------------------|----------------|------------------|-------------------|----------------------------|---------|
|                           | Strongly Agree<br>n (%) | Agree<br>n (%) | Neutral<br>n (%) | Disagree<br>n (%) | Strongly Disagree<br>n (%) |         |
| Internal medicine         | 34 (6.51)               | 49 (9.38)      | 9 (1.72)         | 5 (0.95)          | 2 (0.38)                   |         |
| General surgery           | 10 (1.91)               | 11 (2.10)      | 0 (0)            | 0 (0)             | 0 (0)                      |         |
| Obstetrics and gynecology | 8 (1.53)                | 5 (0.95)       | 2 (0.38)         | 0 (0)             | 0 (0)                      |         |
| Pediatrics                | 15 (2.87)               | 17 (3.25)      | 2 (0.38)         | 0 (0)             | 0 (0)                      |         |
| Family medicine           | 33 (6.32)               | 26 (4.98)      | 5 (0.95)         | 2 (0.38)          | 2 (0.38)                   | 0.223   |
| Orthopedic                | 8 (1.53)                | 9 (1.72)       | 2 (0.38)         | 2 (0.38)          | 0 (0)                      |         |
| Dental                    | 12 (2.29)               | 12 (2.29)      | 1 (0.19)         | 1 (0.19)          | 1 (0.19)                   |         |
| Psychiatry                | 8 (1.53)                | 3 (0.57)       | 0 (0)            | 1 (0.19)          | 1 (0.19)                   |         |
| General                   | 51 (9.77)               | 50 (9.57)      | 13 (2.49)        | 0 (0)             | 7 (1.34)                   |         |
| Ophthalmology             | 14                      | 11 (2.10)      | 2 (0.38)         | 0 (0)             | 0 (0)                      |         |
| Others                    | 32 (6.13)               | 30 (5.74)      | 13 (2.49)        | 0 (0)             | 1 (0.19)                   |         |

No significant association was found between type of specialized medical services received and patient's level of satisfaction at 0.05 level of significance.

458

459

**Table 5. Testing the association between socio-demographic factors with patients' level of satisfaction towards the virtual health care received (Chi Square test).**

| Demographics                                                                                                              | Level of satisfaction   |                |                  |                   |                            | P-value |
|---------------------------------------------------------------------------------------------------------------------------|-------------------------|----------------|------------------|-------------------|----------------------------|---------|
|                                                                                                                           | Strongly Agree<br>n (%) | Agree<br>n (%) | Neutral<br>n (%) | Disagree<br>n (%) | Strongly Disagree<br>n (%) |         |
| <b>Age</b>                                                                                                                |                         |                |                  |                   |                            |         |
| 18-25 years                                                                                                               | 129 (24.71)             | 126 (24.13)    | 26 (4.98)        | 3 (0.57)          | 7 (1.34)                   | 0.159   |
| 26-35 years                                                                                                               | 40 (7.66)               | 46 (8.81)      | 12 (2.29)        | 5 (0.95)          | 2 (0.38)                   |         |
| 36-45 years                                                                                                               | 31 (5.93)               | 33 (6.32)      | 6 (1.14)         | 2 (0.38)          | 2 (0.38)                   |         |
| 46-55 years                                                                                                               | 12 (2.29)               | 14 (2.68)      | 5 (0.95)         | 1 (0.19)          | 3 (0.57)                   |         |
| Above 55 years                                                                                                            | 13 (2.49)               | 4 (0.76)       | 0 (0)            | 0 (0)             | 0 (0)                      |         |
| <b>Gender</b>                                                                                                             |                         |                |                  |                   |                            |         |
| Male                                                                                                                      | 74 (14.17)              | 93 (17.81)     | 21 (4.02)        | 5 (0.95)          | 8 (1.53)                   | 0.157   |
| Female                                                                                                                    | 151 (28.92)             | 130 (24.90)    | 28 (5.36)        | 6 (1.14)          | 6 (1.14)                   |         |
| <b>Educational level</b>                                                                                                  |                         |                |                  |                   |                            |         |
| Primary School                                                                                                            | 1 (0.19)                | 0 (0)          | 0 (0)            | 0 (0)             | 0 (0)                      | 0.095   |
| Middle School                                                                                                             | 2 (0.38)                | 3 (0.57)       | 2 (0.38)         | 0 (0)             | 2 (0.38)                   |         |
| High school                                                                                                               | 46 (8.81)               | 39 (7.47)      | 5 (0.95)         | 1 (0.19)          | 1 (0.19)                   |         |
| University                                                                                                                | 153 (29.31)             | 161 (30.84)    | 39 (7.47)        | 8 (1.53)          | 9 (1.72)                   |         |
| Postgraduate studies                                                                                                      | 23 (4.40)               | 20 (3.83)      | 3 (0.57)         | 2 (0.38)          | 2 (0.38)                   |         |
| <b>Nationality</b>                                                                                                        |                         |                |                  |                   |                            |         |
| Saudi                                                                                                                     | 215 (41.18)             | 217 (41.57)    | 47 (9.00)        | 10 (1.91)         | 14 (2.68)                  | 0.649   |
| Non-Saudi                                                                                                                 | 10 (1.91)               | 6 (1.14)       | 2 (0.38)         | 1 (0.19)          | 0 (0)                      |         |
| No association found between all demographic factors and patient level of satisfaction at the 0.05 level of significance. |                         |                |                  |                   |                            |         |

460

461



**Table 6. Exploring the factors associated with dissatisfaction among patients during the virtual healthcare sessions**

| Problems encountered                  | Overall experience satisfaction |                    |                  |                       |                            |
|---------------------------------------|---------------------------------|--------------------|------------------|-----------------------|----------------------------|
|                                       | Very Satisfied<br>n (%)         | Satisfied<br>n (%) | Neutral<br>n (%) | Dissatisfied<br>n (%) | Very Dissatisfied<br>n (%) |
| Internet connection                   | 16 (3.06)                       | 37 (7.08)          | 30 (5.74)        | 5 (0.95)              | 10 (1.91)                  |
| Difficulty in using the platform      | 7 (1.34)                        | 16 (3.06)          | 13 (2.49)        | 3 (0.57)              | 5 (0.95)                   |
| Long time until start                 | 32 (6.13)                       | 54 (10.34)         | 66 (12.64)       | 5 (0.95)              | 10 (1.91)                  |
| Difficulty in clarifying my concerns  | 27 (5.17)                       | 42 (8.04)          | 45 (8.62)        | 9 (1.72)              | 5 (0.95)                   |
| Healthcare provider was uncooperative | 0 (0)                           | 2 (0.38)           | 14 (2.68)        | 2 (0.38)              | 6 (1.14)                   |
| None                                  | 107 (20.49)                     | 74 (14.17)         | 20 (3.83)        | 0 (0)                 | 4 (0.76)                   |

462

463

**Supplementary Table 1. Patients' opinions regarding virtual health care received during the COVID-19 pandemic era**

| Questions                                                                                                              | Respondents n (%) |
|------------------------------------------------------------------------------------------------------------------------|-------------------|
| Who was attending the virtual clinic? (n=522)                                                                          |                   |
| Me                                                                                                                     | 351 (67.2)        |
| Child under my care                                                                                                    | 56 (10.7)         |
| Older person under my care                                                                                             | 115 (22)          |
| How was the virtual clinic conducted? (n=522)                                                                          |                   |
| Sound only                                                                                                             | 465 (89.1)        |
| Video                                                                                                                  | 57 (10.9)         |
| What was the reason for using a virtual clinic? (n=522)                                                                |                   |
| Appointment                                                                                                            | 95 (18.2)         |
| Counseling and medical advice                                                                                          | 349 (66.9)        |
| Emergency                                                                                                              | 78 (14.9)         |
| With what medical specialty did you meet? (n=522)                                                                      |                   |
| Internal medicine                                                                                                      | 99 (19)           |
| General surgery                                                                                                        | 21 (4)            |
| Obstetrics and gynecology                                                                                              | 15 (2.9)          |
| Pediatrics                                                                                                             | 34 (6.5)          |
| Family medicine                                                                                                        | 68 (13)           |
| Orthopedic                                                                                                             | 21 (4)            |
| Dental                                                                                                                 | 27 (5.2)          |
| Psychiatry                                                                                                             | 13 (2.5)          |
| General                                                                                                                | 121 (23.2)        |
| Ophthalmology                                                                                                          | 27 (5.2)          |
| Others                                                                                                                 | 76 (14.6)         |
| What is your opinion on receiving virtual health care in comparison to traditional, in-person, medical visits? (n=522) |                   |
| Better than traditional                                                                                                | 179 (34.3)        |
| As good as traditional                                                                                                 | 168 (32.2)        |
| Worse than traditional                                                                                                 | 56 (10.7)         |
| Not sure                                                                                                               | 119 (22.8)        |
| Do you prefer to attend your next appointment/counseling in a non-virtual clinic? (n=522)                              |                   |

|                                                                                                                                                           |            |
|-----------------------------------------------------------------------------------------------------------------------------------------------------------|------------|
| Yes                                                                                                                                                       | 236 (45.2) |
| No                                                                                                                                                        | 86 (16.5)  |
| Maybe                                                                                                                                                     | 200 (38.3) |
| Do you prefer to keep using telemedicine platforms after the pandemic ends?<br>(n=522)                                                                    |            |
| Yes                                                                                                                                                       | 217 (41.6) |
| No                                                                                                                                                        | 103 (19.7) |
| Maybe                                                                                                                                                     | 202 (38.7) |
| Do you feel that the physical presence of a doctor and a physical examination<br>by him/her may give you more trust in the diagnosis / treatment? (n=522) |            |
| Yes                                                                                                                                                       | 367 (70.3) |
| No                                                                                                                                                        | 35 (6.7)   |
| Maybe                                                                                                                                                     | 120 (23)   |
| Do you think your presence in the clinical health care unit is essential for your<br>confidentiality in treatment?(n=522)                                 |            |
| Yes                                                                                                                                                       | 261 (50)   |
| No                                                                                                                                                        | 108 (20.7) |
| Maybe                                                                                                                                                     | 153 (29.3) |
| What problems did you face during these sessions? (n=522) (r=606)*                                                                                        |            |
| Internet connection                                                                                                                                       | 98 (18.8)  |
| Difficulty in using the platform                                                                                                                          | 44 (8.4)   |
| Long time until start                                                                                                                                     | 167 (32)   |
| Difficulty clarifying my concerns                                                                                                                         | 128 (24.5) |
| Healthcare provider was uncooperative                                                                                                                     | 24 (4.6)   |
| None                                                                                                                                                      | 205 (39.3) |
| Do you think virtual health care helps to reduce the risk of exposure to COVID-<br>19 virus? (n=522)                                                      |            |
| Yes                                                                                                                                                       | 396 (75.9) |
| No                                                                                                                                                        | 30 (5.7)   |
| Maybe                                                                                                                                                     | 96 (18.4)  |
| Overall experience satisfaction(n=522)                                                                                                                    |            |
| very dissatisfied                                                                                                                                         | 22 (4.2)   |
| dissatisfied                                                                                                                                              | 13 (2.5)   |
| neutral                                                                                                                                                   | 117 (22.4) |

|                |            |
|----------------|------------|
| satisfied      | 194 (37.2) |
| very satisfied | 176 (33.7) |

---

All values are presented as numbers and percentages.

\*n = sample size or total number of cases, r = total number of responses in multiple choices

---

464

465
